# Supplementary material
Source: HighWire-hosted journal article supplement (http://rc.rcjournal.com/highwire/filestream/16289/field_highwire_adjunct_files/0/suppl_1.pdf)
Supplement: suppl_1.pdf [file suppl_1.pdf]

**Baseline characteristics of subjects grouped by between-test concordance or discordance in indicating EIB**

|                        | Treadmill vs. Constant Step   |                               | Treadmill vs. Incremental Step   |                                  | Constant vs. Incremental Step   |                                 |
|------------------------|-------------------------------|-------------------------------|----------------------------------|----------------------------------|---------------------------------|---------------------------------|
|                        | Treadmill (+)<br>Constant (-) | Treadmill (-)<br>Constant (-) | Treadmill (+)<br>Incremental (-) | Treadmill (-)<br>Incremental (-) | Constant (+)<br>Incremental (-) | Constant (-)<br>Incremental (-) |
| Age, y                 | 10 ± 3                        | 13 ± 2                        | 11 ± 3                           | 12 ± 2                           | 11 ± 3                          | 11 ± 3                          |
| Height, cm             | 43 ± 14                       | 50 ± 10                       | 41 ± 17                          | 47 ± 12                          | 39 ± 15                         | 47 ± 14                         |
| Weight, kg             | 146 ± 15                      | 153 ± 11                      | 147 ± 20                         | 151 ± 12                         | 148 ± 20                        | 149 ± 15                        |
| BMI, kg/m <sup>2</sup> | 20 (18 – 22)                  | 21 (18 – 23)                  | 18 (15 – 21)                     | 20 (18 – 22)                     | 16 (15 – 20)                    | 20 (18 – 22)                    |
| GINA                   | 1 (1 – 3)                     | 1 (1 – 4)                     | 2 (1 – 3)                        | 2 (1 – 4)                        | 3 (1 – 3)                       | 2 (1 – 4)                       |
| GINA 1/2/3/4, <i>n</i> | 6/2/1/2                       | 4/3/1/6                       | 6/2/3/3                          | 5/2/2/5                          | 3/0/5/2                         | 8/4/0/6                         |
| FVC, L                 | 2.7 ± 1.2                     | 3.0 ± 0.7                     | 2.6 ± 1.4                        | 2.9 ± 0.7                        | 2.5 ± 1.1                       | 2.9 ± 1.1                       |
| FVC, % predicted       | 109 ± 19                      | 109 ± 8                       | 101 ± 21                         | 109 ± 9                          | 97 ± 15                         | 109 ± 16                        |

|                                       |           |           |           |           |           |           |
|---------------------------------------|-----------|-----------|-----------|-----------|-----------|-----------|
| FEV <sub>1</sub> , L                  | 2.2 ± 0.7 | 2.6 ± 0.6 | 2.0 ± 0.7 | 2.5 ± 0.6 | 1.9 ± 0.6 | 2.4 ± 0.7 |
| FEV <sub>1</sub> , % predicted        | 98 ± 8    | 103 ± 9   | 89 ± 16   | 102 ± 8   | 86 ± 17   | 101 ± 9   |
| FEV <sub>1</sub> /FVC                 | 84 ± 8    | 86 ± 6    | 82 ± 12   | 87 ± 7    | 82 ± 14   | 86 ± 8    |
| PEF, L                                | 5.2 ± 1.8 | 5.6 ± 1.3 | 4.8 ± 1.8 | 5.4 ± 1.4 | 4.6 ± 1.4 | 5.4 ± 1.7 |
| FEF <sub>25-75</sub> , L              | 2.2 ± 0.6 | 2.8 ± 0.7 | 2.0 ± 0.6 | 2.7 ± 0.9 | 2.1 ± 0.9 | 2.5 ± 0.8 |
| FEF <sub>25-75</sub> , %<br>predicted | 110 ± 25  | 110 ± 25  | 101 ± 32  | 120 ± 31  | 104 ± 47  | 114 ± 21  |

---

BMI = body mass index, GINA = Global Initiative for Asthma, FVC = forced vital capacity, PEF = peak expiratory flow, FEF<sub>25-75</sub> = forced expiratory flow between 25% and 75% of FVC.
